# Supplementary material for: Compensation for matrix effects on ICP-OES by on-line calibration methods using a new multi-nebulizer based on Flow Blurring® technology
Source: Royal Society of Chemistry journal article supplement (doi:10.1039/c004854b), 2010-01-01
Supplement: c004854b.pdf [file c004854b.pdf]

## SUPPORTING INFORMATION

### Compensation for matrix effects on ICP-OES by on-line calibration methods using a new multi-nebulizer based on Flow Blurring<sup>®</sup> technology<sup>†</sup>

Miguel Ángel Aguirre<sup>a</sup>, Nikolay Kovachev<sup>a</sup>, Beatriz Almagro<sup>b</sup>, Montserrat Hidalgo<sup>a</sup> and Antonio Canals<sup>a</sup>

<sup>a</sup>Departamento de Química Analítica, Nutrición y Bromatología, Universidad de Alicante, Apdo. 99, Alicante E-03080, Spain. E-mail: a.canals@ua.es

<sup>b</sup>OneNeb (division of Ingeniatics Tecnologías S.L.), P.I. Parque Plata. Camino Mozárabe, 41, 41900 Camas, Sevilla, Spain.

<sup>†</sup>Flow Blurring<sup>®</sup> and Flow Focusing<sup>®</sup> are technologies patented by Ingeniatics Tecnologías S.L.

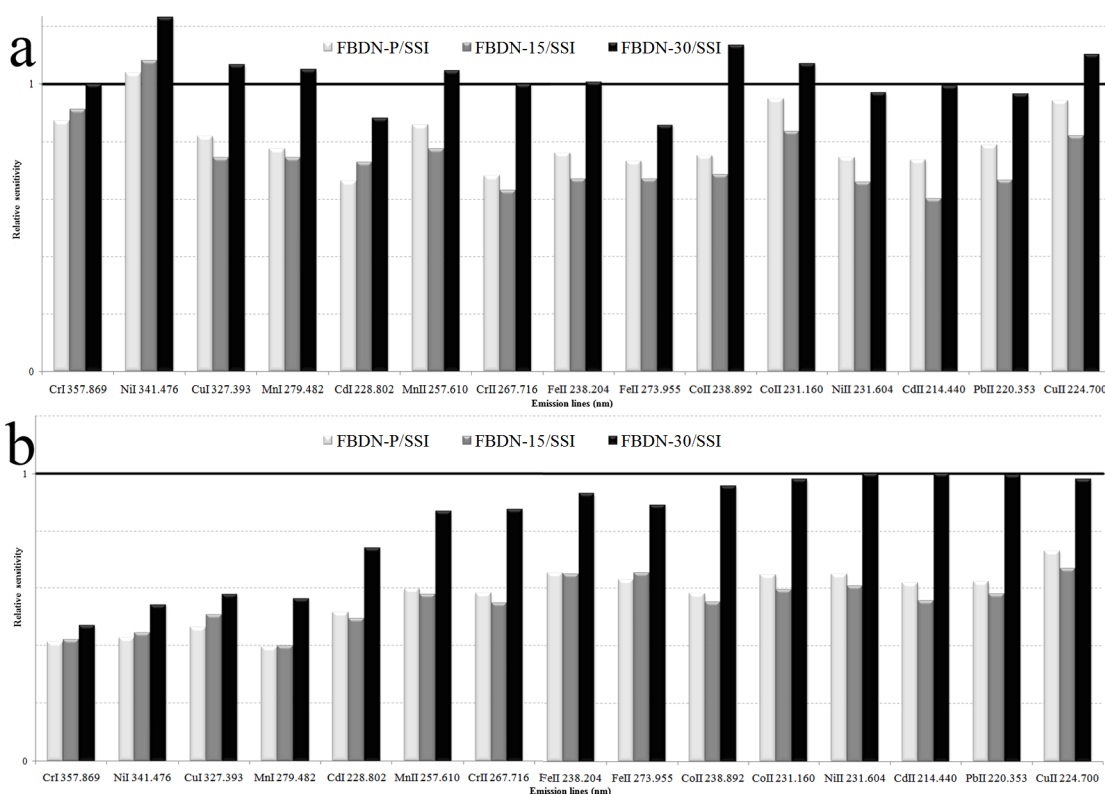

**Fig. S1** Relative sensitivity obtained with external calibration (a) and internal standard calibration (b) methodologies for the different multinebulization systems. (See text for relative sensitivity definition).

**Table S1** ICP-OES operating conditions

| <b>Plasma parameters:</b>                    | <b>Value</b> |
|----------------------------------------------|--------------|
| Outer gas flow (L min <sup>-1</sup> )        | 15           |
| Intermediate gas flow (L min <sup>-1</sup> ) | 0.2          |
| RF power (W)                                 | 1300         |
| Nominal frequency (MHz)                      | 40           |
| Integration time (s)                         | Variable     |
| Read time (s)                                | Variable     |
| Number of replicates                         | 4            |
| Viewing mode                                 | Axial        |
| <b>Conikal nebulizer:</b>                    |              |
| Gas flow rate (L min <sup>-1</sup> )         | 0.7          |
| Liquid uptake rate (μL min <sup>-1</sup> )   | 1000         |
| <b>FBDN-based systems:</b>                   |              |
| Gas flow rate (L min <sup>-1</sup> )         | 0.7          |
| Liquid uptake rate (μL min <sup>-1</sup> )   | 400          |
| <b>Internal standard:</b>                    |              |
| ZnI (213.857 nm) <sup>a</sup>                |              |
| ZnII (206.200 nm) <sup>b</sup>               |              |
| ZnII (202.548 nm) <sup>c</sup>               |              |

<sup>a</sup> Internal standard for all atomic emission lines.

<sup>b</sup> Internal standard for NiII (231.604 nm), PbII (220.353 nm).

<sup>c</sup> Internal standard for the other emission lines.

**Table S2** Emission lines and energy values.

| <b>Emission line (nm)</b> | <b>E<sub>ion</sub> (eV)</b> | <b>E<sub>exc</sub> (eV)</b> | <b>E<sub>sum</sub> (eV)</b> |
|---------------------------|-----------------------------|-----------------------------|-----------------------------|
| CrI (357.869)             | (6.77)                      | 3.46                        | 3.46                        |
| NiI (341.476)             | (7.64)                      | 3.65                        | 3.65                        |
| CuI (327.393)             | (7.73)                      | 3.79                        | 3.79                        |
| MnI (279.482)             | (7.44)                      | 4.43                        | 4.43                        |
| CdI (228.802)             | (8.99)                      | 5.42                        | 5.42                        |
| MnII (257.610)            | 7.44                        | 4.81                        | 12.25                       |
| CrII (267.716)            | 6.77                        | 6.16                        | 12.93                       |
| FeII (238.204)            | 7.87                        | 5.24                        | 13.11                       |
| FeII (273.955)            | 7.87                        | 5.51                        | 13.38                       |
| CoII (238.892)            | 7.88                        | 5.60                        | 13.48                       |
| CoII (231.160)            | 7.88                        | 5.93                        | 13.81                       |
| NiII (231.604)            | 7.64                        | 6.39                        | 14.03                       |
| CdII (214.434)            | 8.99                        | 5.78                        | 14.77                       |
| PbII (220.353)            | 7.42                        | 7.37                        | 14.79                       |
| CuII (224.700)            | 7.73                        | 8.23                        | 15.96                       |

**Table S3** Precision of the FBDN-based and SSI systems at three different concentration levels obtained using external calibration and internal standard calibration.<sup>a</sup>

| <i>Emission line (nm)</i> | <i>RSD (%)</i>         |                        |                        |                        |                        |                        |                        |                        |                        |                        |                        |                        |                        |                        |                        |                        |                        |                        |                        |                        |                        |                        |                        |                        |
|---------------------------|------------------------|------------------------|------------------------|------------------------|------------------------|------------------------|------------------------|------------------------|------------------------|------------------------|------------------------|------------------------|------------------------|------------------------|------------------------|------------------------|------------------------|------------------------|------------------------|------------------------|------------------------|------------------------|------------------------|------------------------|
|                           | <i>SSI</i>             |                        |                        |                        |                        |                        | <i>FBDN-P</i>          |                        |                        |                        |                        |                        | <i>FBDN-15</i>         |                        |                        |                        |                        |                        | <i>FBDN-30</i>         |                        |                        |                        |                        |                        |
|                           | <i>External</i>        |                        |                        | <i>Internal</i>        |                        |                        | <i>External</i>        |                        |                        | <i>Internal</i>        |                        |                        | <i>External</i>        |                        |                        | <i>Internal</i>        |                        |                        | <i>External</i>        |                        |                        | <i>Internal</i>        |                        |                        |
|                           | <i>0.2<sup>b</sup></i> | <i>0.6<sup>b</sup></i> | <i>1.0<sup>b</sup></i> |
| CrI (357.869)             | 1.1                    | 0.8                    | 1.1                    | 1.3                    | 1.2                    | 2                      | 0.8                    | 0.3                    | 0.9                    | 0.5                    | 0.3                    | 0.3                    | 0.9                    | 0.8                    | 0.7                    | 0.7                    | 0.7                    | 0.6                    | 0.8                    | 0.8                    | 0.9                    | 0.4                    | 0.4                    | 0.5                    |
| NiI (341.476)             | 1.2                    | 1.2                    | 1.4                    | 0.4                    | 1.2                    | 0.9                    | 0.5                    | 0.8                    | 1.1                    | 0.4                    | 0.7                    | 0.7                    | 0.4                    | 0.4                    | 0.6                    | <u>0.5</u>             | 0.9                    | 0.4                    | 0.4                    | 0.6                    | 0.8                    | 0.3                    | 0.6                    | 0.5                    |
| CuI (327.393)             | 0.3                    | 1.2                    | 1.5                    | 1.3                    | 1.3                    | 2                      | <u>0.4</u>             | 0.2                    | 0.7                    | 0.6                    | 0.9                    | 0.9                    | <u>0.6</u>             | 1.0                    | 0.7                    | 0.6                    | 0.4                    | 0.12                   | <u>0.8</u>             | 0.7                    | 0.8                    | 0.4                    | 0.4                    | 0.5                    |
| MnI (279.482)             | 0.6                    | 0.6                    | 1.1                    | 0.2                    | 1.2                    | 2                      | <u>1.0</u>             | 0.5                    | 0.6                    | 0.2                    | 0.9                    | 0.5                    | <u>0.8</u>             | <u>0.9</u>             | 0.7                    | 0.2                    | 0.3                    | 0.2                    | <u>0.8</u>             | <u>0.9</u>             | 0.4                    | <u>0.6</u>             | 0.5                    | 0.5                    |
| CdI (228.802)             | 1.2                    | 0.8                    | 0.9                    | 0.5                    | 1.0                    | 1.0                    | 0.9                    | 0.4                    | 0.9                    | <u>0.7</u>             | 0.6                    | 0.4                    | 0.7                    | 0.3                    | 0.4                    | <u>0.7</u>             | 0.7                    | 0.5                    | 0.4                    | <u>0.9</u>             | 0.8                    | <u>0.5</u>             | 0.4                    | 0.7                    |
| MnII (257.610)            | 1.2                    | 0.7                    | 1.1                    | 1.0                    | 3                      | 2                      | 0.7                    | 0.5                    | 1.0                    | <u>0.8</u>             | 0.13                   | 0.7                    | 0.9                    | <u>0.9</u>             | 0.5                    | 0.4                    | 0.3                    | 0.7                    | 0.6                    | <u>0.8</u>             | 0.7                    | 0.4                    | 0.6                    | 0.3                    |
| CrII (267.716)            | 0.9                    | 1.0                    | 1.2                    | 0.3                    | 3                      | 2                      | 0.9                    | 0.5                    | 0.8                    | <u>0.6</u>             | 0.8                    | 0.7                    | 0.7                    | 0.9                    | 0.5                    | 0.3                    | 0.2                    | 0.7                    | 0.6                    | 0.8                    | 0.6                    | <u>0.5</u>             | 0.3                    | 0.4                    |
| FeII (238.204)            | 1.1                    | 1.0                    | 1.1                    | 1.1                    | 3                      | 2                      | 0.7                    | 0.6                    | 0.6                    | 0.7                    | 0.3                    | 0.8                    | 0.9                    | 0.8                    | 0.6                    | 1.0                    | 0.2                    | 0.7                    | 0.4                    | 0.7                    | 0.8                    | 0.3                    | 0.5                    | 0.3                    |
| FeII (273.955)            | 1.0                    | 2                      | 1.0                    | 1.2                    | 0.7                    | 0.6                    | 0.7                    | 0.5                    | 0.3                    | 0.4                    | 0.7                    | 0.4                    | 0.5                    | 0.4                    | 0.4                    | 0.8                    | 0.5                    | 0.6                    | 0.3                    | 0.9                    | 0.5                    | 0.2                    | 0.5                    | 0.5                    |
| CoII (238.892)            | 1.5                    | 1.3                    | 1.4                    | 0.4                    | 1.4                    | 2                      | 0.8                    | 0.4                    | 0.8                    | <u>0.9</u>             | 0.6                    | 0.6                    | 0.6                    | 0.6                    | 0.6                    | <u>0.6</u>             | 0.3                    | 0.3                    | 0.4                    | 0.5                    | 0.4                    | <u>0.7</u>             | 0.8                    | 0.4                    |
| CoII (231.160)            | 1.4                    | 2                      | 2                      | 0.3                    | 0.9                    | 0.4                    | 0.4                    | 0.6                    | 0.3                    | 0.1                    | 0.7                    | 0.4                    | 0.4                    | 0.5                    | 0.5                    | <u>0.7</u>             | 0.3                    | <u>0.5</u>             | 0.5                    | 0.6                    | 0.5                    | 0.3                    | 0.7                    | 0.3                    |
| NiII (231.604)            | 1.4                    | 2                      | 1.1                    | 0.4                    | 1.0                    | 2                      | 0.5                    | 0.6                    | 0.8                    | 0.4                    | 0.9                    | 0.4                    | 0.9                    | 0.4                    | 0.6                    | <u>1.0</u>             | 0.9                    | 0.4                    | 0.6                    | 0.4                    | 0.6                    | <u>0.5</u>             | 0.3                    | 0.3                    |
| CdII (214.434)            | 1.1                    | 0.8                    | 1.2                    | 0.3                    | 3                      | 2                      | 0.3                    | 0.8                    | 0.7                    | <u>0.4</u>             | 0.5                    | 0.5                    | 0.7                    | 0.7                    | 0.6                    | 0.3                    | 0.5                    | 0.2                    | 0.9                    | 0.2                    | 0.6                    | <u>0.6</u>             | 0.4                    | 0.3                    |
| PbII (220.353)            | 2                      | 2                      | 1.5                    | 1.0                    | 1.5                    | 2                      | 0.9                    | 0.3                    | 0.2                    | <u>0.9</u>             | 0.2                    | 0.5                    | 0.7                    | 0.4                    | 0.4                    | 1.0                    | 1.0                    | 0.6                    | 0.7                    | 0.2                    | 0.9                    | 0.3                    | 0.6                    | 0.6                    |
| CuII (224.700)            | 2                      | 2                      | 2                      | 0.2                    | 0.7                    | 0.3                    | 0.7                    | 0.4                    | 0.3                    | <u>0.6</u>             | 0.6                    | <u>0.5</u>             | 1.0                    | 0.6                    | 0.5                    | <u>0.7</u>             | 1.0                    | <u>0.9</u>             | 0.3                    | 0.3                    | 0.6                    | <u>0.4</u>             | 0.6                    | <u>0.6</u>             |

<sup>a</sup>Underlined numbers represent RSD (%) values higher than the reference (results obtained with SSI at the same concentration level).

<sup>b</sup>mg L<sup>-1</sup>.

**Table S4** Limits of detection (LOD) obtained using external calibration and internal standard calibration.<sup>a,b</sup>

| Emission line (nm) | LOD ( $\mu\text{g L}^{-1}$ ) |          |             |             |             |            |             |            |
|--------------------|------------------------------|----------|-------------|-------------|-------------|------------|-------------|------------|
|                    | SSI                          |          | FBDN-P      |             | FBDN-15     |            | FBDN-30     |            |
|                    | External                     | Internal | External    | Internal    | External    | Internal   | External    | Internal   |
| CrI (357.869)      | 0.3                          | 0.4      | 0.04        | <u>0.5</u>  | <u>0.4</u>  | <u>1.1</u> | <u>0.7</u>  | 0.4        |
| NiII (341.476)     | 3                            | 5        | 0.4         | <u>6</u>    | <u>2</u>    | 4          | 2           | 5          |
| CuI (327.393)      | 0.4                          | 1.3      | <u>1.0</u>  | 1.1         | <u>0.6</u>  | 1.0        | 0.3         | 0.9        |
| MnI (279.482)      | 0.06                         | 0.3      | <u>0.2</u>  | <u>0.4</u>  | <u>0.7</u>  | <u>1.0</u> | <u>0.5</u>  | 0.2        |
| CdI (228.802)      | 0.06                         | 0.2      | <u>0.4</u>  | 0.13        | <u>0.09</u> | <u>0.3</u> | <u>0.11</u> | 0.2        |
| MnII (257.610)     | 0.10                         | 0.02     | 0.02        | <u>0.08</u> | 0.02        | 0.02       | 0.011       | 0.02       |
| CrII (267.716)     | 0.05                         | 0.5      | 0.04        | 0.05        | 0.03        | 0.08       | <u>0.06</u> | 0.13       |
| FeII (238.204)     | 0.3                          | 3        | 0.09        | 0.10        | 0.10        | 0.2        | 0.11        | 0.13       |
| FeII (273.955)     | 0.11                         | 6        | 0.08        | 0.3         | <u>0.3</u>  | 0.5        | <u>0.4</u>  | 0.7        |
| CoII (238.892)     | 0.10                         | 0.4      | <u>0.3</u>  | 0.10        | 0.09        | 0.3        | <u>0.2</u>  | 0.3        |
| CoII (231.160)     | 0.2                          | 0.9      | 0.08        | 0.2         | 0.10        | 0.3        | 0.2         | 0.3        |
| NiII (231.604)     | 0.08                         | 2        | <u>0.10</u> | 0.12        | <u>0.2</u>  | 0.2        | <u>0.3</u>  | 0.3        |
| CdII (214.434)     | 0.2                          | 0.4      | <u>0.3</u>  | 0.4         | <u>0.6</u>  | <u>0.5</u> | 0.2         | <u>0.6</u> |
| PbII (220.353)     | 0.3                          | 0.5      | <u>2</u>    | <u>3</u>    | <u>3</u>    | <u>2</u>   | <u>3</u>    | <u>3</u>   |
| CuII (224.700)     | 0.3                          | 0.4      | <u>1.1</u>  | <u>1.2</u>  | <u>1.1</u>  | <u>2</u>   | <u>1.3</u>  | <u>2</u>   |

<sup>a</sup> Liquid and gas flows used with FBDN-based systems as on Table S1.

<sup>b</sup> Underlined numbers represent LOD values higher than the reference (results obtained with SSI at the same concentration level).
